# Supplementary material for: Increasing Incidence of Salmonella in Australia, 2000-2013
Source: PubMed Central journal article supplement (PMC5061413; doi:10.1371/journal.pone.0163989), 2016-10-12

S1 Fig. State and territory crude (dots) and predicted (lines with 95% CI) notification rates per 100,000 persons, Australia 2000-2013

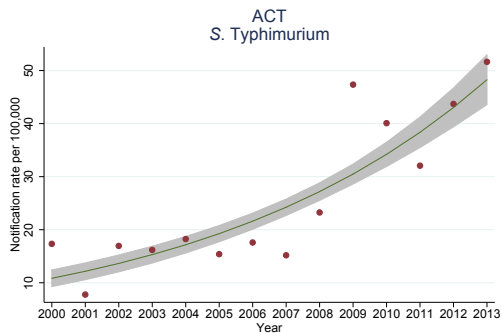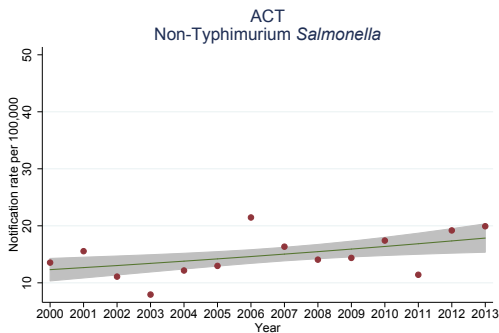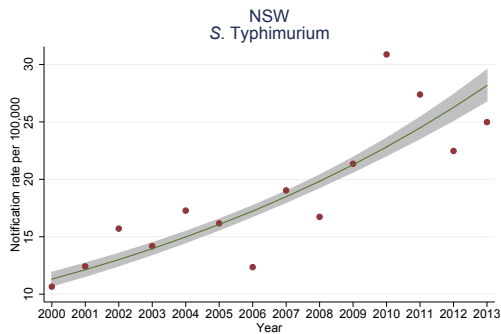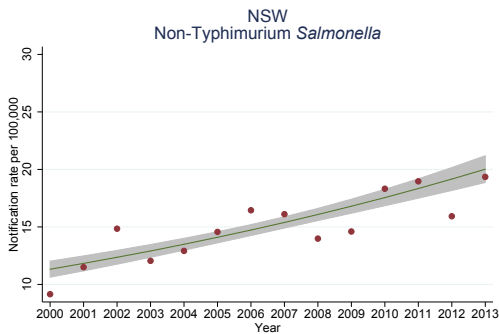

NT  
*S. Typhimurium*

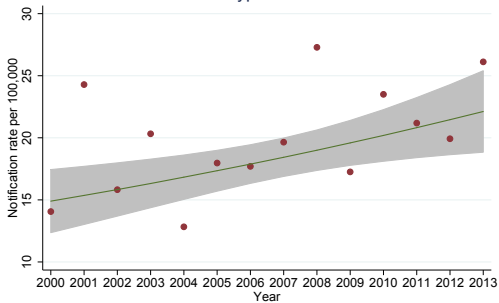

NT  
Non-Typhimurium *Salmonella*

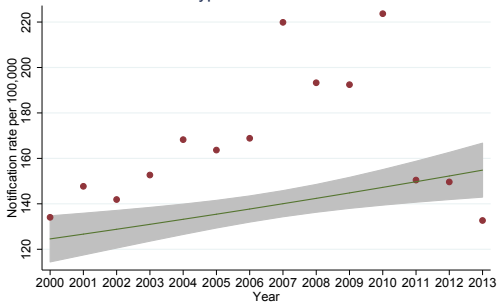

Qld  
*S. Typhimurium*

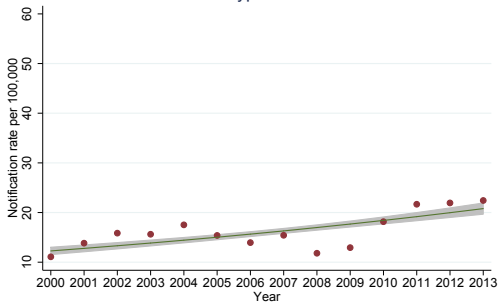

Qld  
Non-Typhimurium *Salmonella*

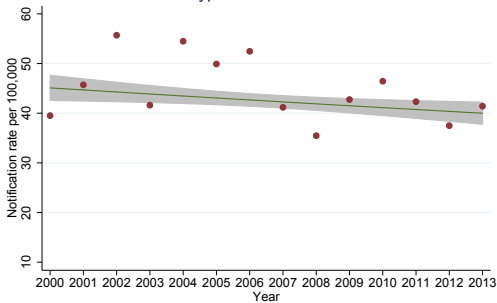

SA  
*S. Typhimurium*

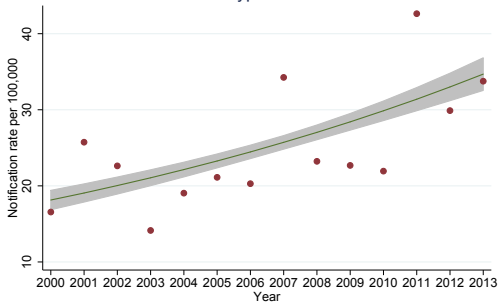

SA  
Non-Typhimurium *Salmonella*

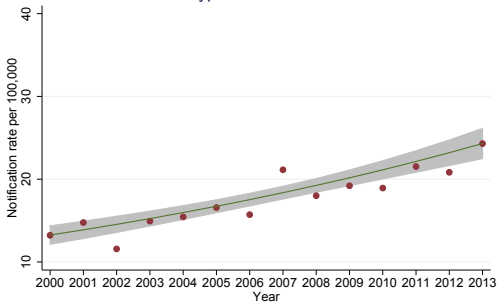

Tas  
*S. Typhimurium*

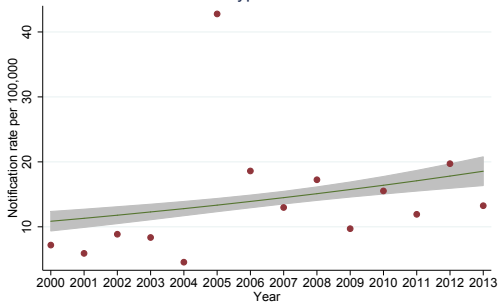

Tas  
Non-Typhimurium *Salmonella*

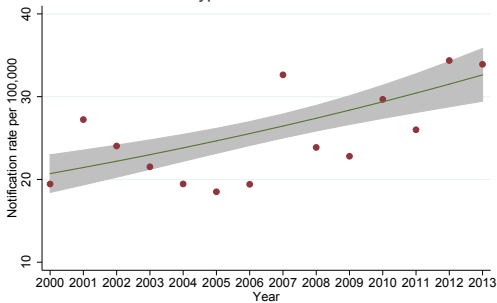

Vic  
*S. Typhimurium*

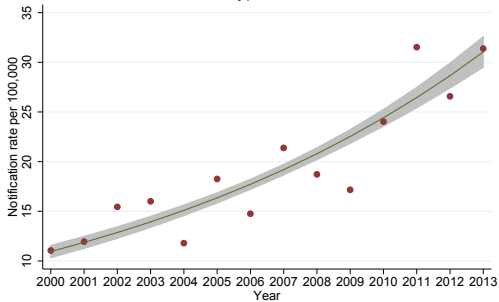

Vic  
Non-Typhimurium *Salmonella*

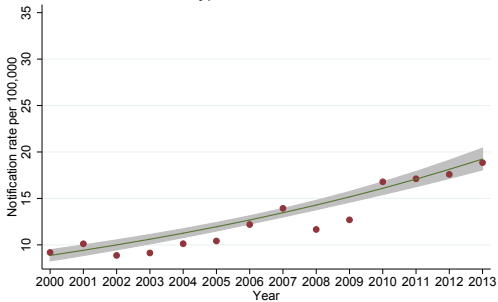

WA  
*S. Typhimurium*

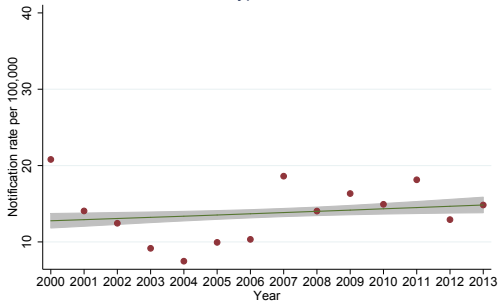

WA  
Non-Typhimurium *Salmonella*

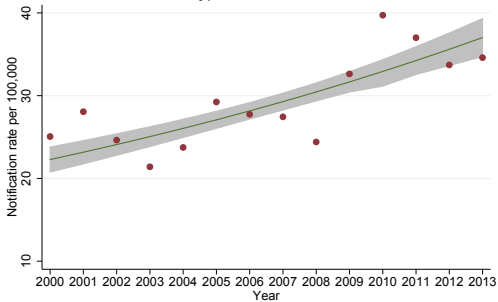

Supplement: pone.0163989.s001.pdf [file pone.0163989.s001.pdf]
