# Supplementary material for: Increasing Incidence of Salmonella in Australia, 2000-2013
Source: PubMed Central journal article supplement (PMC5061413; doi:10.1371/journal.pone.0163989), 2016-10-12

**S2 Fig. *Salmonella* Typhimurium and non-Typhimurium predicted notification rates per 100,000 (with 95% CI) by age group for each State and Territory, 2000-2013**

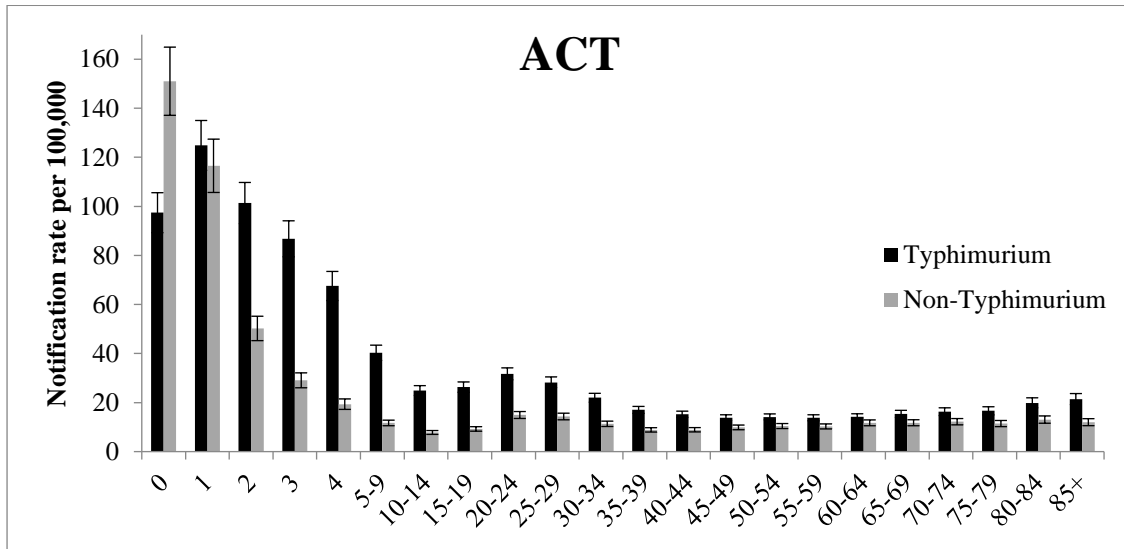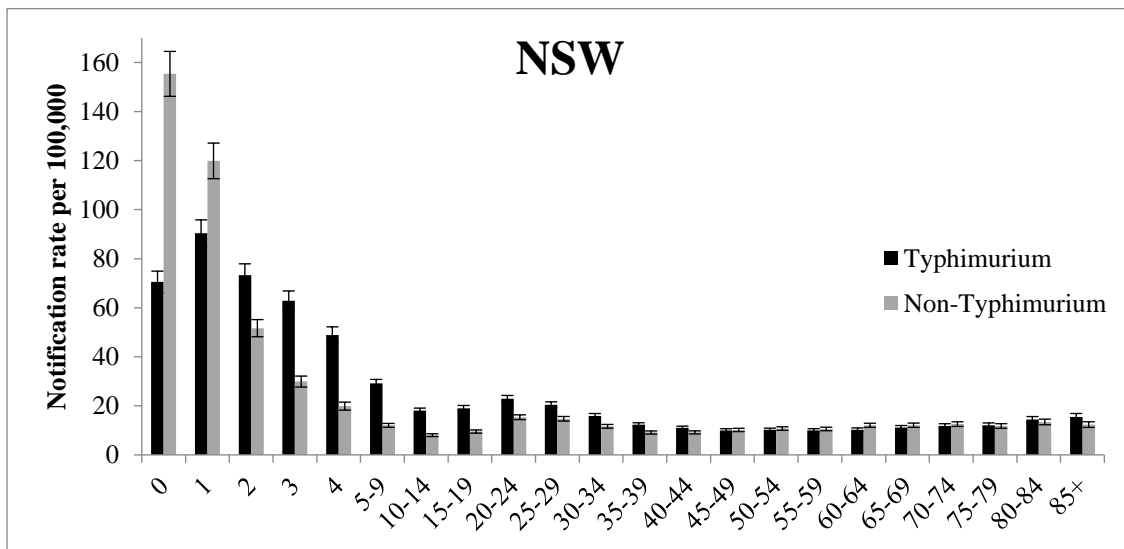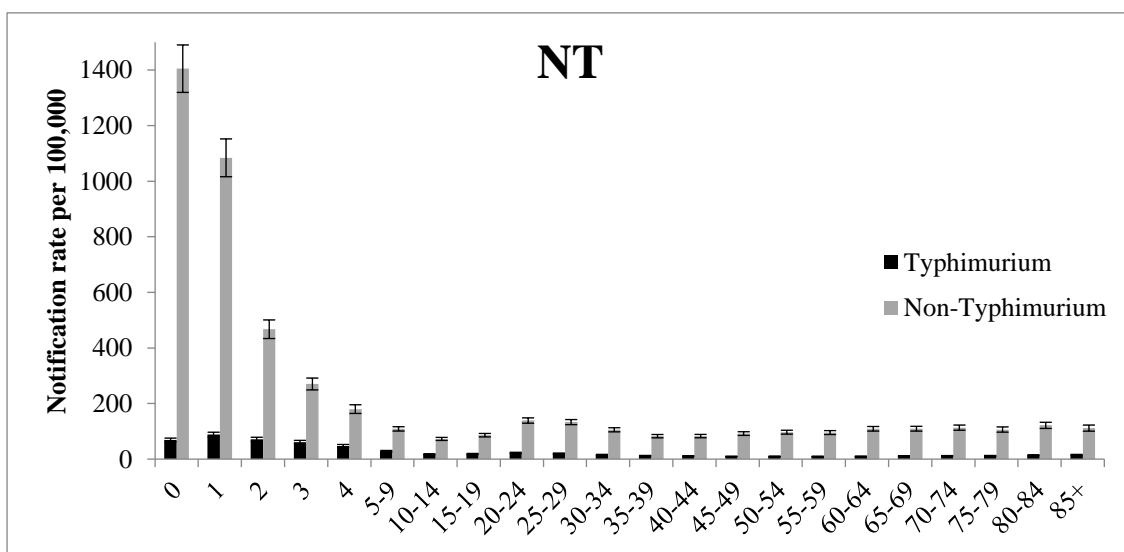

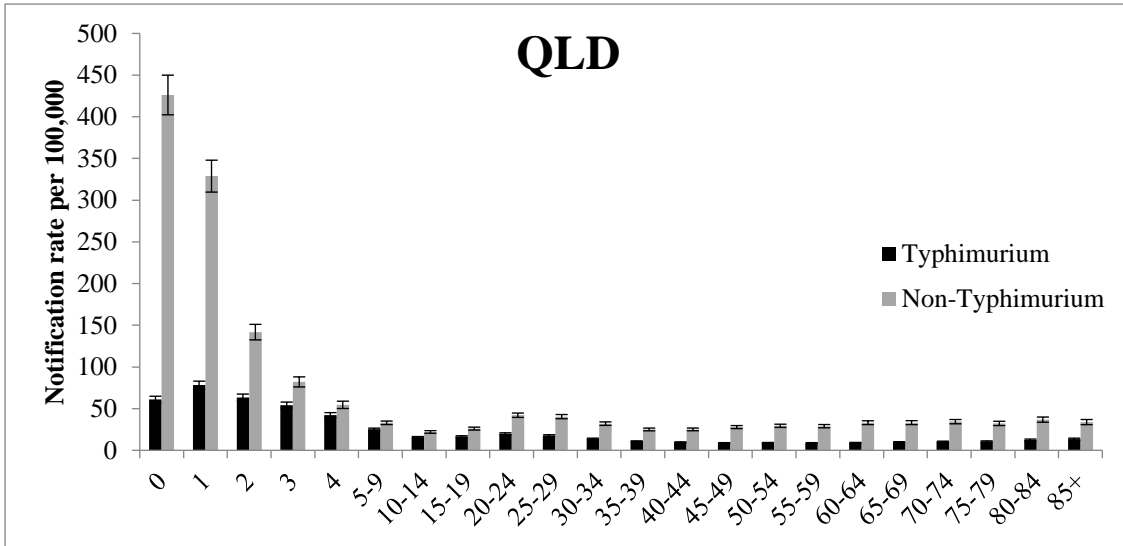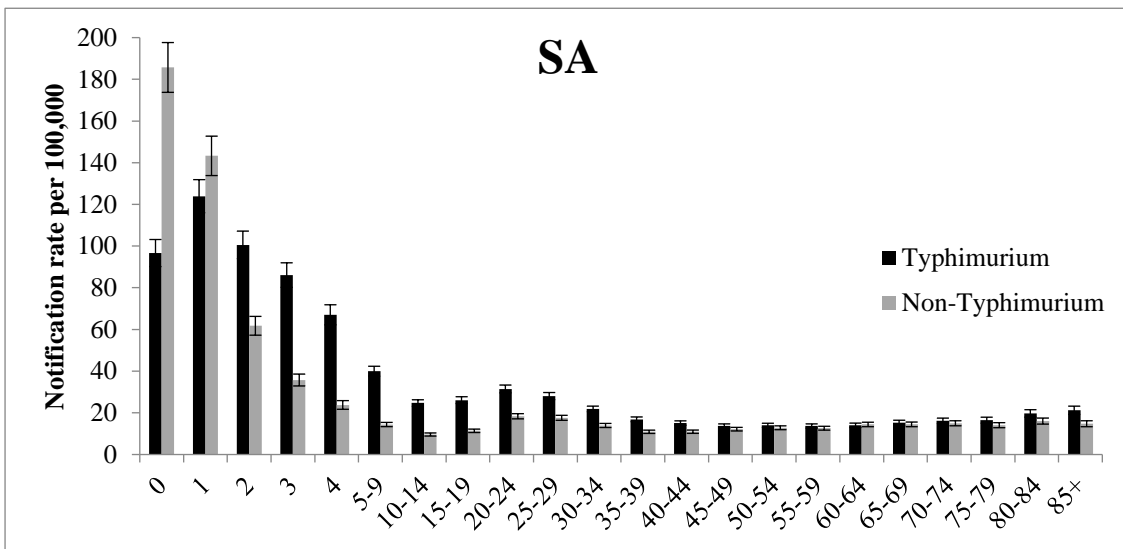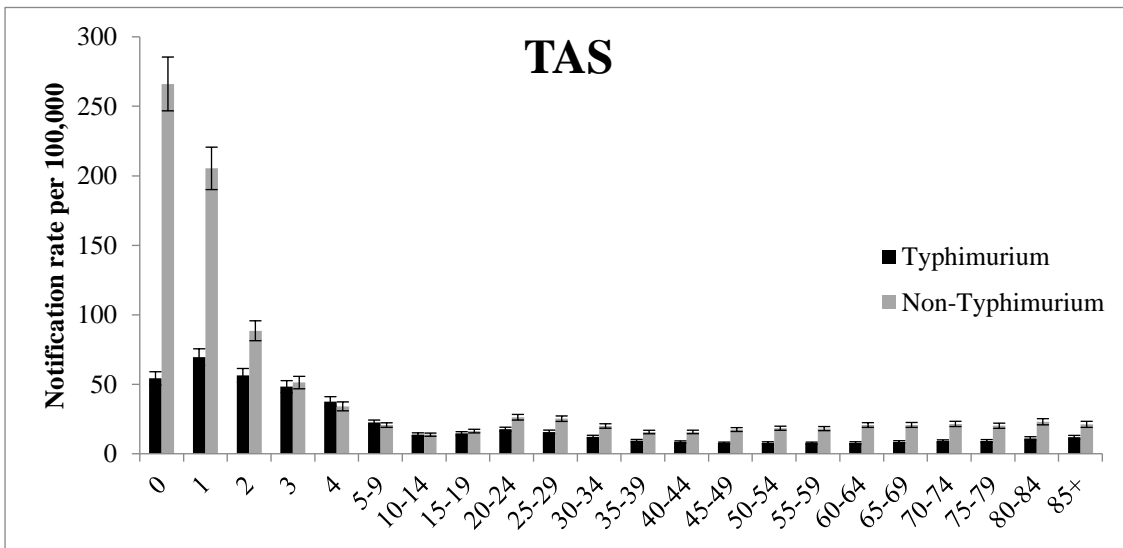

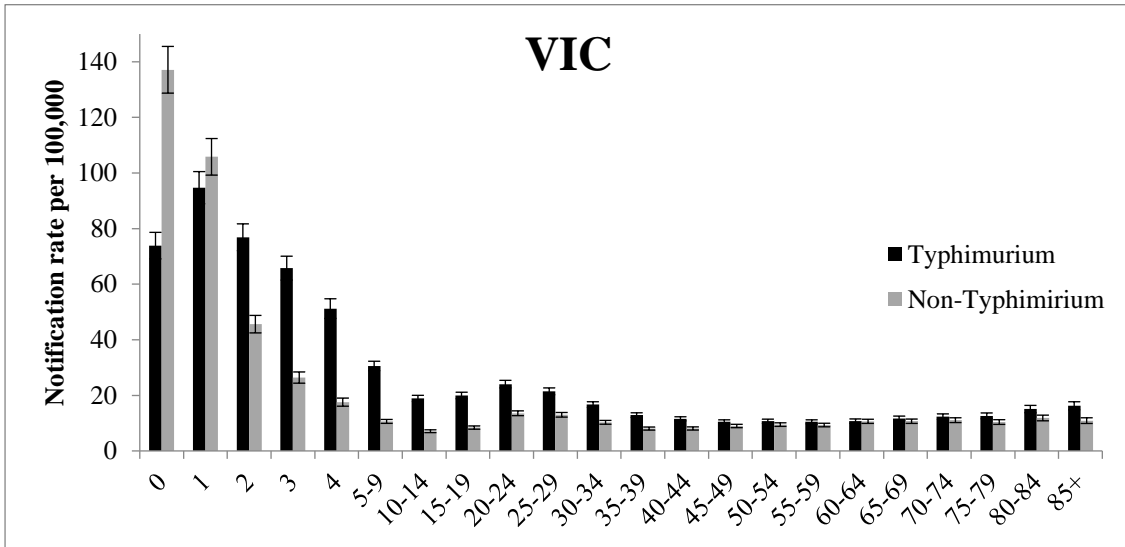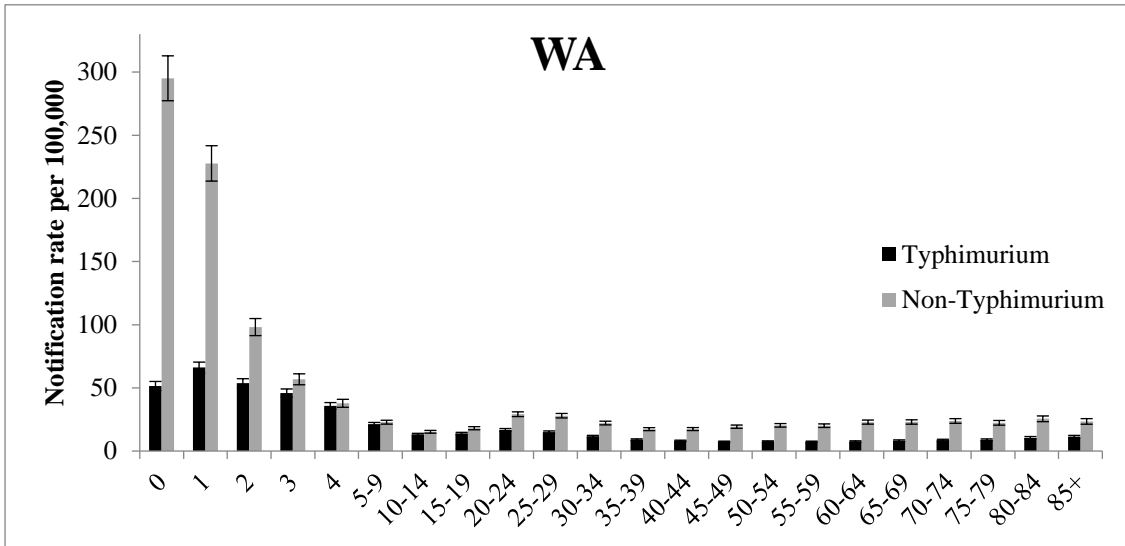

Supplement: pone.0163989.s002.pdf [file pone.0163989.s002.pdf]
